# Supplementary material
Source: HighWire-hosted journal article supplement (https://bmjopen.bmj.com/content/10/10/e039027)
Supplement: inline-supplementary-material-1 [file inline-supplementary-material-1.pdf]

## Appendix to Public managers' role in creating workplace social capital (WSC) and its effect on employees' well-being and health – a protocol of a longitudinal cohort study (PUMA-WSC)

| Workplace Social Capital (WSC) |                  |                                                                                                                                                                                                                                                                                                                                                                  |
|--------------------------------|------------------|------------------------------------------------------------------------------------------------------------------------------------------------------------------------------------------------------------------------------------------------------------------------------------------------------------------------------------------------------------------|
| Index                          | Cronbach's Alpha | Items                                                                                                                                                                                                                                                                                                                                                            |
| Bonding                        | 0.82             | In our group, we help colleagues who have too much to do<br>In our group, we agree on what is most important in our work tasks<br>I trust the group's ability to do the work well<br>There is a sense of unity and cohesion in my group                                                                                                                          |
| Bridging                       | 0.83             | Our group and other groups / departments recognize each other's contribution to solving the tasks at work<br>We agree on the main goals of our work across the departments of the organization<br>Other groups provide us with the information we need for our work to be done well<br>Other groups have a great understanding of the work we do in our group    |
| Linking                        | 0.91             | Our immediate manager considers our needs and point of view when making decisions<br>The immediate manager helps solve specific problems we face during the workday<br>Our immediate manager has great understanding of the work we are doing<br>The relationship between our group and our immediate manager is characterized by mutual respect and recognition |
| Organizational                 | 0.78             | Employees are involved in decisions about changes of the workplace<br>There is a common understanding between management and employees about how to perform the work tasks<br>In our group we feel a strong connection to our workplace                                                                                                                          |

*Note: Each question is answered using a five-point Likert scale (1 = very low degree to 5 = very high degree). The items' and indices are validated by Borg et al. 2014. Documentation and psychometric properties can be found in [1]. We use WSC both as a global measure and the different types as indices in the analyses.*

**Stress**

| Index  | Cronbach's Alpha | Items                                                                                                                                                  |
|--------|------------------|--------------------------------------------------------------------------------------------------------------------------------------------------------|
| Stress | 0.88             | How often have you had problems relaxing?<br>How often have you been irritable?<br>How often have you been tense?<br>How often have you been stressed? |

*Note: Each question is answered using a five-point Likert scale (1 = not at all to 5 = all the time). The items' and index stems from Copenhagen Psychosocial Questionnaire II validated by Bjorner and Pejtersen (2010). Documentation and psychometric properties can be found in [2]. We handle well-being as an index in the analyses*

**Public service motivation**

| Single items              | Dimension                         | Items                                                                       |
|---------------------------|-----------------------------------|-----------------------------------------------------------------------------|
| Public service motivation | Self-sacrifice                    | I am willing to risk personal loss to help society                          |
|                           | Compassion                        | It is difficult for me to contain my feelings when I see people in distress |
|                           | Attraction to public policy       | The give and take of public policy making does appeal to me                 |
|                           | Commitment to the public interest | It is important for me that public services contribute to the common good   |

*Note: Each question is answered using a five-point Likert scale (1 = strongly disagree to 5 = strongly agree). In favor of parsimony, we use a global PSM measure consisting of four items, each reflecting one PSM dimension. The measure is similar to the scale proposed by Vandenberg and de Vries in [3].*

**Organizational commitment**

| Index                     | Cronbach's Alpha | Items                                                                                                                                                                                                  |
|---------------------------|------------------|--------------------------------------------------------------------------------------------------------------------------------------------------------------------------------------------------------|
| Organizational commitment | 0.84             | To my friends I praise this organization a great place to work<br>My values are very similar to the organization's values<br>This organization really inspires me to give my very best job performance |

*Note: Each question is answered using a five-point Likert scale (1 = strongly disagree to 5 = strongly agree). The items are developed by Mowday, Steers and Porter (1979) [4] and the index is further validated in QPS-Nordic by Wännström et al. (2009). Documentation and psychometric properties can be found in [5]. We handle organizational commitment as an index in the analyses.*

All the above described measures are included in the survey on job satisfaction and psychosocial work environment. Cronbach's alpha has been calculated on the bases of the 2017 job-satisfaction survey. The questionnaire has been and will be sent to all employees who receive a monthly salary from Esbjerg Municipality. Therefore, the sample do not include:

- Hourly-paid employees (typically temporary staff and student assistants).
- Foster families in the Municipality.

- Trainees and students in short-term employment.
- Members of councils and boards (e.g., city council, grant board).
- Employees of the joint fire service (which run in collaboration with other municipalities).

### Management behavior

| Index                               | Cronbach's Alpha | Items                                                                                                                                 |
|-------------------------------------|------------------|---------------------------------------------------------------------------------------------------------------------------------------|
|                                     |                  | <i>The leader ...</i>                                                                                                                 |
| Strategic management                | 0.93             | Is good at being assertive upwards in the system                                                                                      |
|                                     |                  | Contributes to a good collaboration between different units (e.g. institutions, departments, divisions and units) in the municipality |
|                                     |                  | States clear goals for the workplace                                                                                                  |
|                                     |                  | Supports the municipality's visions and policies                                                                                      |
|                                     |                  | Shows the direction of the unit's long-term development                                                                               |
| Personnel management                | 0.96             | Lead the way for changes we have to endure                                                                                            |
|                                     |                  | Makes use of staff competencies and resources                                                                                         |
|                                     |                  | Inspires and motivates the employees to do their best                                                                                 |
|                                     |                  | Contributes to a work environment characterized by learning and development                                                           |
|                                     |                  | Recognizes employees' successes and achievements                                                                                      |
| Professional management             | 0.95             | Takes care of conflicts in a constructive way                                                                                         |
|                                     |                  | Actively contributes to the well-being in the unit                                                                                    |
|                                     |                  | Focuses on involving citizens and collaborators (e.g. users, parents, relatives, companies) to solve the cores task of the workplace  |
|                                     |                  | Strives for high professional quality of the unit's services                                                                          |
|                                     |                  | Motivates employees to find new and better ways to solve work tasks                                                                   |
| Management of Finances & Operations | 0.95             | Does one's best to ensure employees in the unit have the proper competencies                                                          |
|                                     |                  | Contributes to a constructive cooperation within the unit                                                                             |
|                                     |                  | Appropriately delegates relevant tasks                                                                                                |
|                                     |                  | Sets clear and distinct financial goals                                                                                               |
|                                     |                  | Follows up on the unit's goal fulfilment                                                                                              |
| Personal management                 | 0.93             | Seeks new ways to improve the performance of the unit                                                                                 |
|                                     |                  | Appropriately prioritizes work tasks of the unit                                                                                      |
|                                     |                  | Is good at coordinating the unit's work tasks                                                                                         |
|                                     |                  | Is working to create an effective unit                                                                                                |
|                                     |                  | Emphasizes one's management responsibilities clearly and distinctly                                                                   |
|                                     |                  | Is good at making decisions                                                                                                           |
|                                     |                  | Shares relevant information and knowledge                                                                                             |
|                                     |                  | Listens to employees' ideas and point of views                                                                                        |
|                                     |                  | Is trustworthy                                                                                                                        |
|                                     |                  | Continually strives to become a better leader                                                                                         |

*Note: The questionnaire is sent to all managers (and their subordinates, peers and top manager) who have been employed for three months or longer. Each question is answered using a seven-point Likert scale (1 = strongly*

---

disagree to 7 = strongly agree). The items were developed with inspiration from classical management literature [6] by a steering group (consisting of HR experts and managers in Esbjerg Municipality). They were subsequently tested by a user group of selected managers in order to test the face validity. Furthermore, cognitive interviews have been performed to ensure correct context sensitive wordings, and the questionnaire were adjusted accordingly. Cronbach's alpha is calculated from subordinates' survey-responses in 2016. We will code the open-ended questions in the management evaluations using deductive thematic coding technics.[7] We do the coding in Nvivo.

## REFERENCES

- 1 Borg V, Mateu N, Clausen T. Udvikling af en ny metode til undersøgelse af social kapital på arbejdspladsen Dokumentationsrapport. Report 2014.
- 2 Bjorner JB, Pejtersen JH. Evaluating construct validity of the second version of the Copenhagen Psychosocial Questionnaire through analysis of differential item functioning and differential item effect. *Scandinavian journal of public health* 2010;38(3 Suppl):90–105.
- 3 Vandenabeele W, Vries JP de. A Global Measure of Public Service Motivation: Comparing a Global Scale of PSM to the Kim et al. (2013) Measure. Paper presented at the SGIII on Public Personnel Policies at the EGPA conference 2015, Toulouse.
- 4 Mowday RT, Steers RM, Porter LW. The measurement of organizational commitment. *Journal of Vocational Behavior* 1979;14(2):224–47.
- 5 Wännström I, Peterson U, Asberg M, et al. Psychometric properties of scales in the General Nordic Questionnaire for Psychological and Social Factors at Work (QPS): confirmatory factor analysis and prediction of certified long-term sickness absence. *Scand J Psychol* 2009;50(3):231–44.
- 6 Yukl GA. Leadership in organizations, 8th edn. Harlow: Pearson Education 2013.
- 7 Miles MB, Huberman AM, Saldaña J. Qualitative data analysis: A methods sourcebook, 3rd edn. Los Angeles, London, New Delhi, Singapore, Washington DC: Sage 2014.
